# Supplementary material
Source: PubMed Central journal article supplement (PMC3563726)

## Supplemental Figure Legends

### Supplemental Figure 1 - Relative size of Hardy Fractions is unaffected by 3H9

transgene or *Tlr9* genotype. BM isolated from MRL.*Fas<sup>lpr</sup>* mice of the indicated genotypes was stained for FACS analysis of Hardy fractions, expressed here as a percentage of live bone marrow cells. Populations were defined as follows: (A) Fractions A-C': EMA<sup>-</sup> B220<sup>+</sup> CD43<sup>+</sup> (B) Fraction D: EMA<sup>-</sup> B220<sup>+</sup> CD43<sup>-</sup> CD93<sup>+</sup> IgMa<sup>-</sup> (C) Fraction E: EMA<sup>-</sup> B220<sup>+</sup> CD43<sup>-</sup> CD93<sup>+</sup> IgMa<sup>+</sup> (D) Fraction F: EMA<sup>-</sup> B220<sup>+</sup> CD43<sup>-</sup> CD93<sup>-</sup> IgMa<sup>+</sup>. Data are from the same animals in Figure S2C-S2D.

### Supplemental Figure 2 - 3H9/ $\lambda$ 1 B cells generate TLR9-dependent EF

plasmablasts but do not enter GCs or the long-lived BM AFC compartment. (A-C) Immunofluorescent staining of spleen sections from 19 week old mice with  $\lambda$ 1 (red), PNA (green) and CD19 (blue). Scale bar = 200  $\mu$ m. (A) 3H9<sup>+</sup> *Tlr9<sup>+/+</sup>* MRL.*Fas<sup>lpr</sup>* and (B) 3H9<sup>+</sup> *Tlr9<sup>-/-</sup>* MRL.*Fas<sup>lpr</sup>*. (C) Magnified view of region indicated by white box in (A) with individual channels and merged image as indicated. Data in (A-C) are representative of 3 mice per genotype. (D)  $\lambda$ 1<sup>+</sup> ELISPOTs were measured from BM of 17-20 week old MRL.*Fas<sup>lpr</sup>* mice of the indicated genotypes. Data are pooled from two independent experiments,  $n=3-8$  mice per group.

### Supplemental Figure 3 - $\lambda$ x L chain usage among B cell populations. Frequency of

$\lambda$ x<sup>+</sup> cells among (A) splenic CD19<sup>+</sup> CD93<sup>-</sup> CD21/35<sup>int</sup> CD23<sup>+</sup> FO B cells, (B) splenic CD19<sup>+</sup> CD93<sup>-</sup> CD21/35<sup>+</sup> CD23<sup>-</sup> MZ B cells, (C) splenic CD19<sup>+</sup> CD93<sup>+</sup> transitional B cells, or (D) LN CD19<sup>+</sup> B cells. Data are from the same animals in Figure 5.

### Supplemental Figure 4 - BrdU is incorporated into developing B cells, but mature

FO B cells are quiescent. (A-B) 8-10 wk old mice were given 0.5 mg BrdU *i.p.* every

12 hours for 0, 2 or 4 days before sacrifice. BrdU staining among (A) CD19<sup>+</sup> CD22<sup>+</sup> CD44<sup>low</sup> 11<sup>+</sup> naive B cells or (B) total CD19<sup>+</sup> CD22<sup>+</sup> CD44<sup>low</sup> naive B cells. Data are pooled from three experiments. (C) BrdU staining among B220<sup>+</sup> bone marrow cells from 6-9 week old mice of the indicated genotypes following a 2 hr pulse of BrdU (0.5 mg/animal *i.p.*) The majority of this incorporation was in the IgM<sup>-</sup> compartment (not shown). (D) BrdU incorporation among CD22<sup>+</sup> CD21/35<sup>int</sup> CD23<sup>+</sup> λ1<sup>+</sup> FO B cells from 6-9 week old MRL.*Fas<sup>dpr</sup>* of the indicated genotypes following a 2hr BrdU pulse (0.5 mg/animal *i.p.*) was not significantly above background staining. Data are pooled from three experiments. (E-F) Representative λ1 and BrdU staining of FO B cells in (D) from mice of indicated genotypes. The broader distribution of the measurement of "%BrdU<sup>+</sup>" populations in (D) column 3 vs. column 4 is a result of differences in the relative proportion of λ1<sup>+</sup> cells in the FO in these two groups, not due to differences in BrdU incorporation, which was negligible.

# Supplemental Figure 1

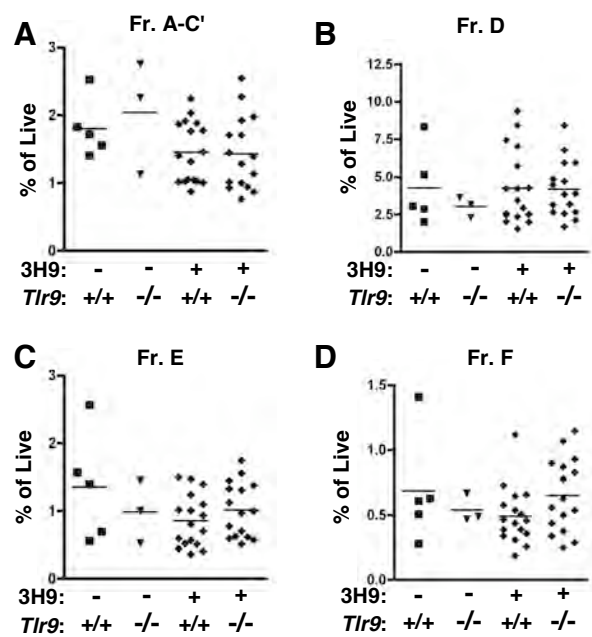

Supplemental Figure 2

A

3H9<sup>+</sup> *Tlr9*<sup>+/+</sup> MRL.*Fas*<sup>lpr</sup>

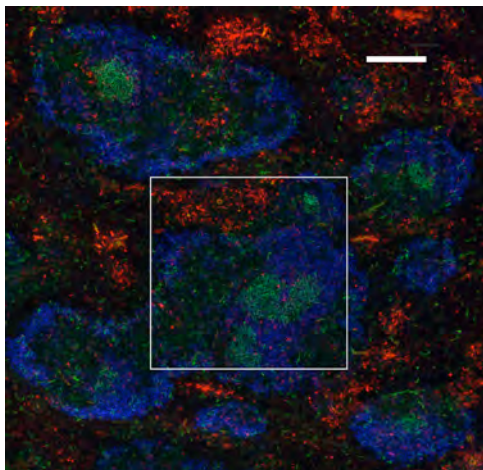

B

3H9<sup>+</sup> *Tlr9*<sup>-/-</sup> MRL.*Fas*<sup>lpr</sup>

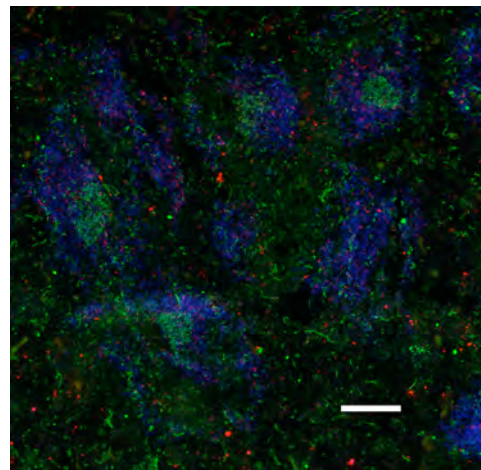

C

lambda-1

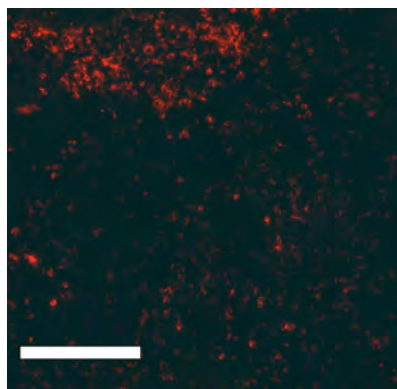

PNA

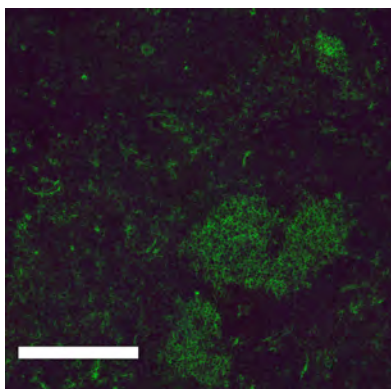

CD19

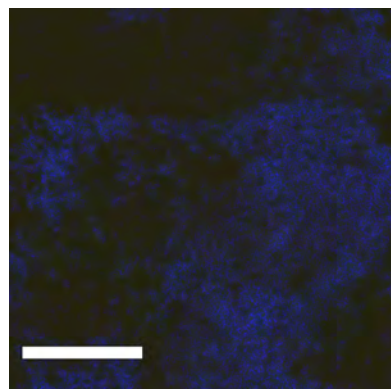

merge

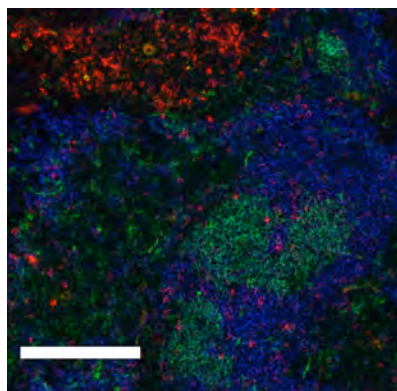

D

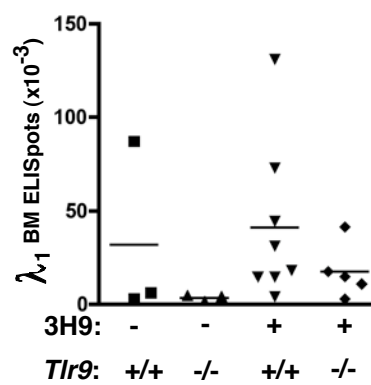

### Supplemental Figure 3

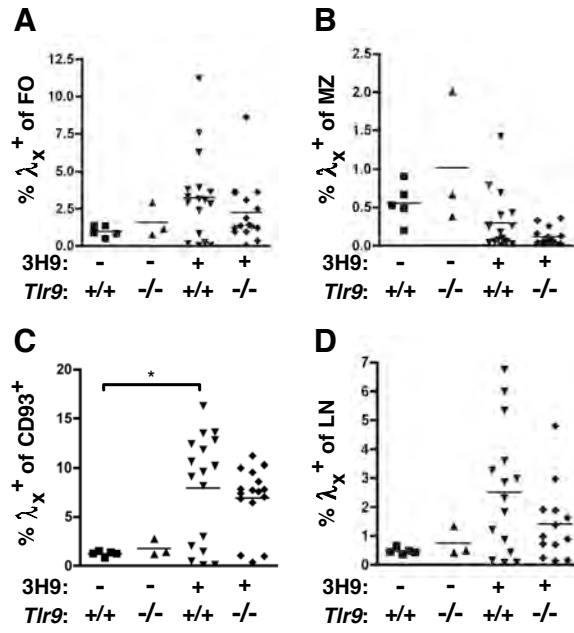

# Supplemental Figure 4

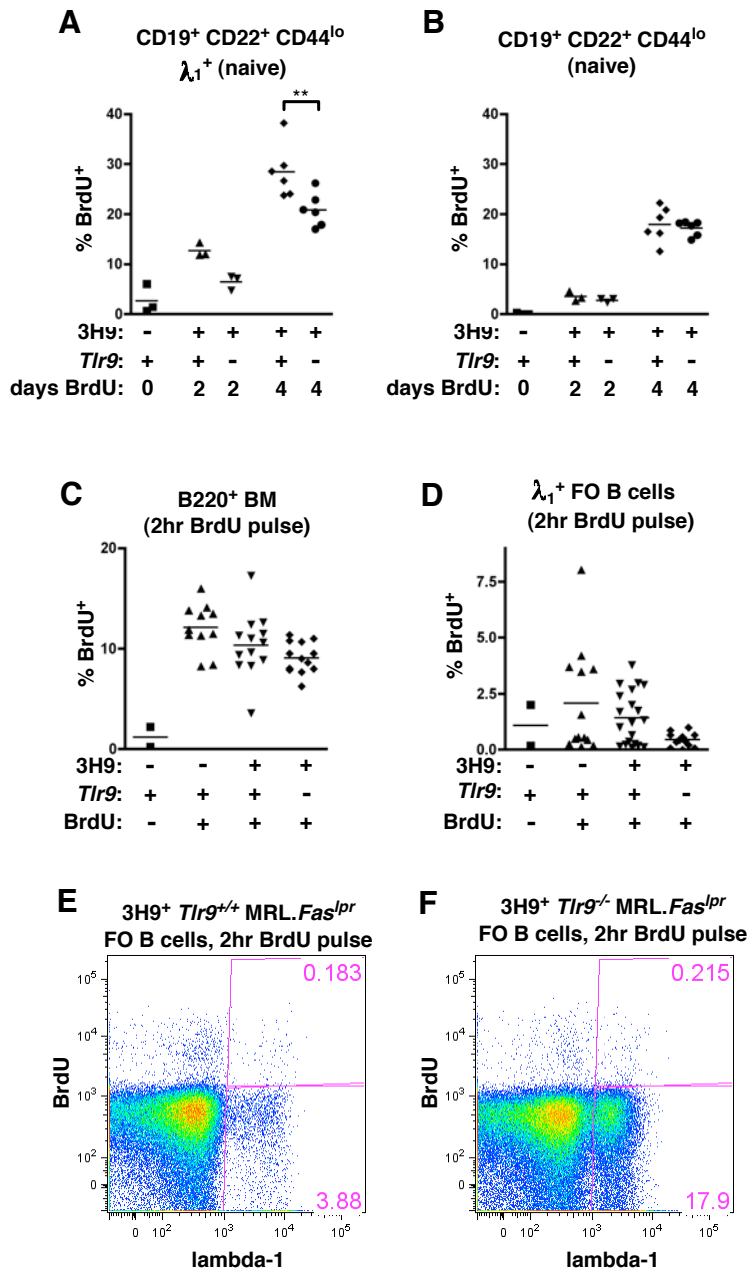

Supplement: NIHMS429404-supplement-1.pdf [file NIHMS429404-supplement-1.pdf]
